# Supplementary material for: Diagnostic accuracy of the rapid urine lipoarabinomannan test for pulmonary tuberculosis among HIV-infected adults in Ghana–findings from the DETECT HIV-TB study
Source: PubMed Central journal article supplement (PMC4591579; doi:10.1186/s12879-015-1151-1), 2015-10-01
Supplement: 12879_2015_1151_MOESM2_ESM.pdf [file 12879_2015_1151_MOESM2_ESM.pdf]

**Additional file 2: The original 2012 LAM test reference scale card used in the study and interpretation.** The integers under the reference card correspond to grade 1 cut-point (1), grade 2 cut-point (2), grade 3 cut-point (3), grade 4 cut-point (4) and grade 5 cut-point (5).

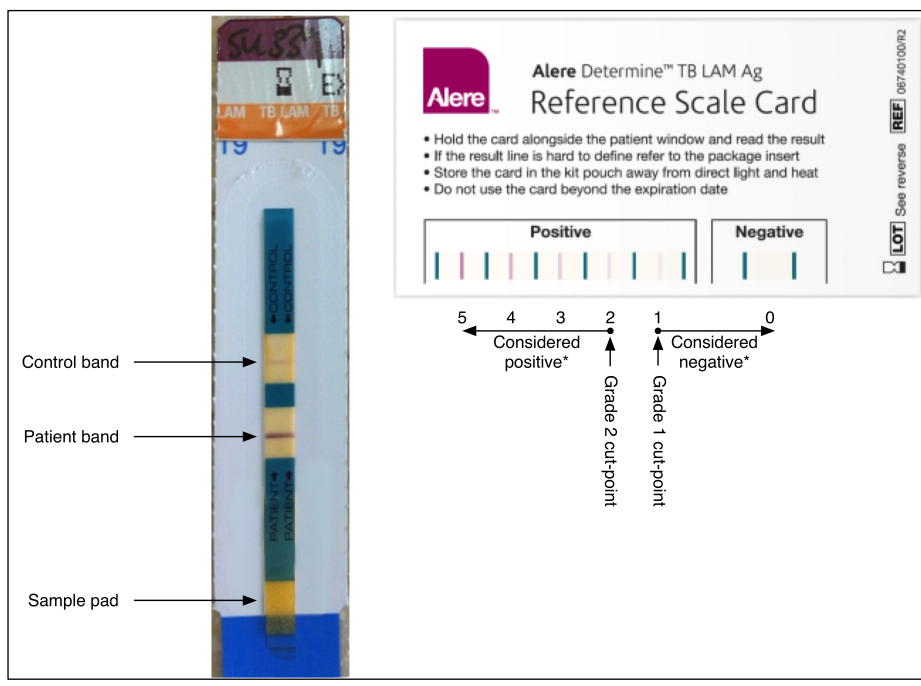

\*Interpretation of positivity threshold is indicated by “Considered positive”.
