# Supplementary material for: Diagnostic accuracy of the rapid urine lipoarabinomannan test for pulmonary tuberculosis among HIV-infected adults in Ghana–findings from the DETECT HIV-TB study
Source: PubMed Central journal article supplement (PMC4591579; doi:10.1186/s12879-015-1151-1), 2015-10-01
Supplement: 12879_2015_1151_MOESM4_ESM.pdf [file 12879_2015_1151_MOESM4_ESM.pdf]

**Additional file 4. Accuracy of the LAM test by by band grade cut-point**

| Test band grade     | Total N (%) | Sensitivity |            | Specificity |             | LR (+)          | LR (-)        | PPV        | NPV        |
|---------------------|-------------|-------------|------------|-------------|-------------|-----------------|---------------|------------|------------|
|                     |             | N           | % (95% CI) | N           | % (95% CI)  | % (95% CI)      | % (95% CI)    | % (95% CI) | % (95% CI) |
| ≥ Faint             | 168 (36%)   | 47/55       | 85 (73-93) | 186/414     | 45 (40-50)  | 1.5 (1.3-1.8)   | 0.3 (0.2-0.6) | 17 (13-22) | 96 (92-98) |
| ≥ Grade 1 cut-point | 62 (13%)    | 34/55       | 62 (48-75) | 341/414     | 82 (78-86)  | 3.5 (2.6-4.7)   | 0.5 (0.3-0.7) | 32 (23-42) | 94 (91-96) |
| ≥ Grade 2 cut-point | 10 (2%)     | 24/55       | 44 (30-58) | 393/414     | 95 (92-97)  | 8.6 (5.1-14.4)  | 0.6 (0.5-0.8) | 53 (38-68) | 93 (90-95) |
| ≥ Grade 3 cut-point | 10 (2%)     | 34/55       | 38 (25-52) | 400/414     | 97 (94-98)  | 11.3 (6.1-20.9) | 0.6 (0.5-0.8) | 60 (42-76) | 92 (89-95) |
| ≥ Grade 4 cut-point | 16 (4%)     | 40/55       | 27 (16-41) | 404/414     | 98 (96-99)  | 11.3 (5.3-23.9) | 0.7 (0.6-0.9) | 60 (39-79) | 91 (88-94) |
| ≥ Grade 5 cut-point | 9 (2%)      | 51/55       | 7 (2-18)   | 409/414     | 99 (97-100) | 6 (1.7-21.8)    | 0.9 (0.9-1)   | 44 (14-79) | 89 (86-92) |

LR (+) = Positive Likelihood Ratio; LR (-) = Negative Likelihood Ratio; PPV = Positive Predictive Value; NPV = Negative Predictive Value
