# Supplementary material for: Diagnostic accuracy of the rapid urine lipoarabinomannan test for pulmonary tuberculosis among HIV-infected adults in Ghana–findings from the DETECT HIV-TB study
Source: PubMed Central journal article supplement (PMC4591579; doi:10.1186/s12879-015-1151-1), 2015-10-01
Supplement: 12879_2015_1151_MOESM6_ESM.pdf [file 12879_2015_1151_MOESM6_ESM.pdf]

**Additional file 6a: Inter-variability for spot and morning samples as to presence versus absence of a test band with intensity grade 2 cut-point or higher**

| Spot  | Morning |    | Total* |
|-------|---------|----|--------|
|       | 0       | 1  |        |
| 0     | 352     | 14 | 366    |
| 1     | 4       | 26 | 30     |
| Total | 356     | 40 | 396    |

Agreement as to test band grade 2 or higher was 95.5% (kappa 0.72; SE 0.05)

**Additional file 6b: Inter-variability for spot and morning samples by test band grade cut-points**

| Spot  | Morning |       |    |    |   |    |   |     | Total* |
|-------|---------|-------|----|----|---|----|---|-----|--------|
|       | 0       | Faint | 1  | 2  | 3 | 4  | 5 |     |        |
| 0     | 72      | 60    | 26 | 2  | 3 | 2  | 0 | 165 |        |
| Faint | 33      | 88    | 22 | 2  | 0 | 1  | 1 | 147 |        |
| 1     | 14      | 8     | 29 | 3  | 0 | 0  | 0 | 54  |        |
| 2     | 0       | 1     | 2  | 3  | 2 | 1  | 0 | 9   |        |
| 3     | 0       | 0     | 0  | 4  | 1 | 1  | 0 | 6   |        |
| 4     | 1       | 0     | 0  | 1  | 0 | 5  | 3 | 10  |        |
| 5     | 0       | 0     | 0  | 0  | 0 | 1  | 4 | 5   |        |
| Total | 120     | 157   | 79 | 15 | 6 | 11 | 8 | 396 |        |

Agreement as to test band grade was 51.0% (kappa 0.30; SE 0.03)

\* For 73 (15.6%) participants we did not have both spot and morning urine samples available
